# Supplementary material for: Methylmercury Poisoning Induces Cardiac Electrical Remodeling and Increases Arrhythmia Susceptibility and Mortality
Source: MDPI journal article supplement (doi:10.3390/ijms21103490), 2020-05-15
Supplement: s1 [file s1]

**Table 1.** Action Potential Characteristics in hearts from control and MeHg treated animals for 4 weeks. n = 8-14 animals.\*p<0.05. RP, resting membrane potential; APA, action potential amplitude; APD<sub>30</sub>, action potential duration at 30% of repolarization; APD<sub>90</sub>, action potential duration at 90% of repolarization; Triang, action potential triangulation (APD<sub>90</sub>-APD<sub>30</sub>); dV/dt, maximum upstroke velocity.

|                              | Basic Cycle Length Duration (ms) |             |            |             |            |             |            |             |
|------------------------------|----------------------------------|-------------|------------|-------------|------------|-------------|------------|-------------|
|                              | 300                              |             | 500        |             | 800        |             | 1000       |             |
|                              | Cntrl (14)                       | MeHg (7)    | Cntrl (13) | MeHg (8)    | Cntrl (12) | MeHg (9)    | Cntrl (12) | MeHg (8)    |
| <b>RP (mV)</b>               | -75.7 ± 0.9                      | -75 ± 0.9   | -78 ± 2    | -76 ± 1.2   | -75 ± 0.7  | -75 ± 1     | -74 ± 0.7  | -76 ± 1     |
| <b>APA (mV)</b>              | 90.4 ± 3.4                       | 87 ± 2.4    | 89.3 ± 2.6 | 88.8 ± 1.8  | 91.3 ± 2.5 | 89 ± 1.4    | 89.8 ± 1.9 | 90.3 ± 1.3  |
| <b>APD<sub>30</sub> (ms)</b> | 17.6 ± 1.1                       | 21.2 ± 2    | 16.9 ± 1   | 20.6 ± 2.5  | 16.3 ± 0.9 | 20.9 ± 2.6  | 15.5 ± 0.8 | 19.3 ± 2.4  |
| <b>APD<sub>90</sub> (ms)</b> | 56.5 ± 1.4                       | 67.3 ± 5.2* | 54.4 ± 1.7 | 66.4 ± 6.6* | 52.1 ± 2.3 | 67.3 ± 6*   | 51.3 ± 2   | 68.2 ± 8.5* |
| <b>Triang (ms)</b>           | 38.8 ± 1.6                       | 46 ± 4.1    | 37.5 ± 1.9 | 45.8 ± 4.5  | 35.8 ± 1.8 | 46.5 ± 4.1* | 35.8 ± 1.8 | 48.9 ± 6.4* |
| <b>dV/dt (V/ms)</b>          | 109.2 ± 11                       | 110 ± 22    | 126 ± 19   | 155 ± 42    | 111 ± 10   | 141 ± 46    | 109 ± 10   | 144 ± 47    |

**Table 2.** Biophysical characteristics of  $I_{Ca-L}$  and  $I_{to}$  in control and in MeHg treated animals for 4 weeks. Number of cells in parenthesis. \* $p < 0.05$ .

|                                                                 | <b>Control</b>       | <b>MeHg</b>            |
|-----------------------------------------------------------------|----------------------|------------------------|
| <b><math>I_{Ca-L}</math> Activation <math>V_h</math> (mV)</b>   | $-7.05 \pm 1.5$ (7)  | $-8.5 \pm 2.3$ (6)     |
| <b><math>I_{Ca-L}</math> Inactivation <math>V_h</math> (mV)</b> | $31.5 \pm 5$ (7)     | $30.1 \pm 1.9$ (6)     |
| <b><math>I_{to}</math> Activation <math>V_h</math> (mV)</b>     | $5.1 \pm 2.9$ (18)   | $1.8 \pm 2.4^*$ (14)   |
| <b><math>I_{to}</math> Inactivation <math>V_h</math> (mV)</b>   | $-44.7 \pm 1.7$ (12) | $-49.2 \pm 0.8^*$ (13) |
| <b><math>I_{to}</math> <math>\tau_{recovery}</math> (ms)</b>    | $63.6 \pm 9.1$ (7)   | $174.2 \pm 44.4^*$ (7) |

**Table 3.** Biophysical characteristics of hKv4.3, hERG and hKv7.1/mink channels in HEK293 cells in control and in the presence of increasing concentrations of MeHg. Number of cells in parenthesis. \*p < 0.05. (///) hKv7.1/mink tail currents were not detectable in the presence of 1 nM of MeHg.

|                                                        | [MeHg] (nM)      |                  |                  |                 |
|--------------------------------------------------------|------------------|------------------|------------------|-----------------|
|                                                        | 0                | 0.01             | 0.1              | 1               |
| I <sub>hKv4.3</sub> Inactivation V <sub>h</sub> (mV)   | -56.8 ± 1.6 (12) | -54.9 ± 1.5 (7)  | -58.5 ± 1.3 (6)  | -58.5 ± 1.3 (5) |
| I <sub>hKv4.3</sub> Recovery τ (ms)                    | 150.7 ± 12.9 (6) | 191.5 ± 25 (6)   | 169 ± 13.9 (8)   | 190 ± 22.4 (6)  |
| I <sub>hERG</sub> Activation V <sub>h</sub> (mV)       | -3.1 ± 2.1 (8)   | 3.9 ± 1.1 (9)    | 0.5 ± 1.4 (12)   | -6.7 ± 1.8 (5)  |
| I <sub>hERG</sub> Reversal V (mV)                      | -66.5 ± 2.3 (10) | -60.6 ± 2.2 (14) | -61.1 ± 1.1 (14) | -68.5 ± 3.3 (5) |
| I <sub>hK7.1/mink</sub> Activation V <sub>h</sub> (mV) | 10.2 ± 2 (6)     | 16.9 ± 2.2 (6)   | 26.9 ± 6.1 (7)*  | ///             |
